# Supplementary material
Source: Springer Nature journal article supplement (https://www.springermedizin.de/resource/supplementary/12937_2011_427_MOESM4_ESM.pdf/25653086)

- diet tea and coffee
- diet drinks
- unsweetened tea and coffee
- low fat low sugar milk

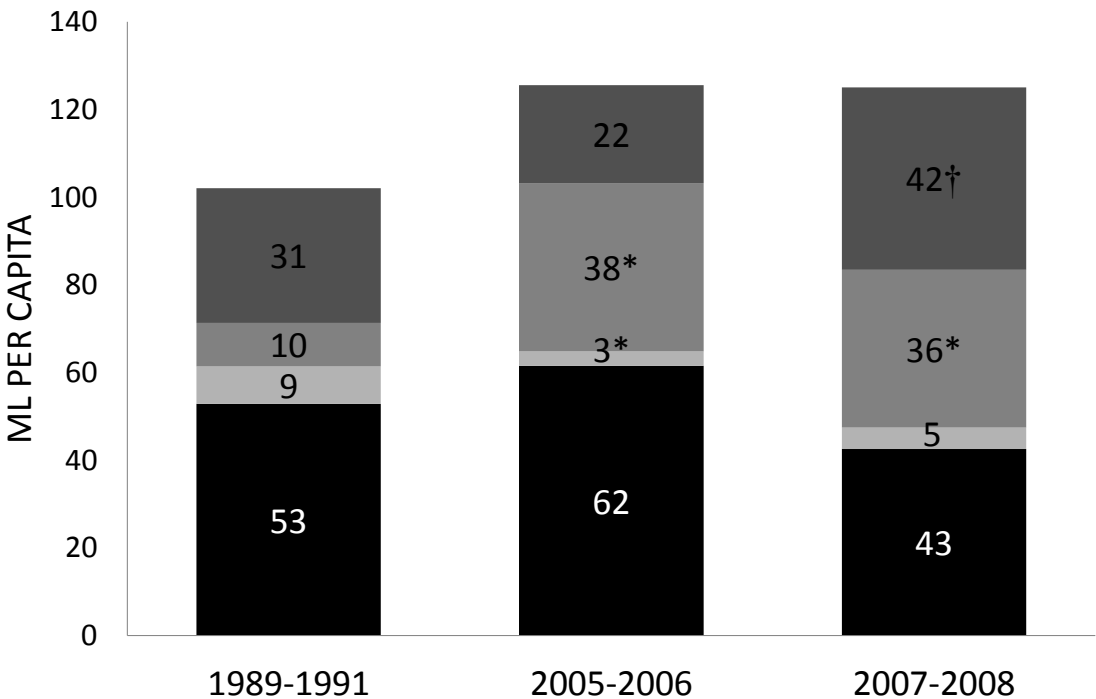

Supplement: MOESM4 [file 25653086]
